# Supplementary material for: Detecting global influence of transcription factor interactions on gene expression in lymphoblastoid cells using neural network models
Source: Research Square preprint supplement (doi:10.21203/rs.3.rs-406028/v1), 2021-04-15
Supplement: Supplementary file 1 [file de6872fc5d5cc24227b538c5.xlsx]

## Sheet: S3A
Interactions	NID Score	Log2NID Scores
ARID3A-CHD1-GATAD2B	6.23963	2.64146
ARID3A-CHD1-GATAD2B-RELA	6.21542	2.63585
ARID3A-GATAD2B	6.49634	2.69963
ARID3A-GATAD2B-RELA	6.15994	2.62292
ARNT-ATF2-ESRRA	5.5878	2.48228
ARNT-ATF2-ESRRA-ZNF24	5.22793	2.38624
ARNT-ATF2-JUND	5.50706	2.46128
ARNT-ATF2-JUND-ZNF24	5.46583	2.45044
ASH2L-JUND	7.95984	2.99274
ASH2L-MAZ	5.32522	2.41284
ATF2-ESRRA	5.64348	2.49659
ATF2-JUND	5.80039	2.53615
ATF2-JUND-ZNF24	5.36324	2.42311
ATF2-NRF1	6.18767	2.6294
ATF2-RELB	5.60519	2.48676
BCL3-HDAC2	5.18526	2.37442
CREM-RELA	6.1067	2.61039
EP300-PBX3	5.97085	2.57794
EP300-TAF1	5.27019	2.39785
ESRRA-FOXM1-GATAD2B	5.28951	2.40314
ESRRA-JUND	6.20983	2.63455
EZH2-KDM5A-SUZ12	5.29146	2.40366
EZH2-MYC	5.92188	2.56606
FOXK2-MTA2	6.20589	2.63364
FOXM1-GATAD2B	5.48053	2.45431
FOXM1-PKNOX1	5.64981	2.4982
GATAD2B-JUND-RELB	5.46905	2.45129
GATAD2B-JUND-RELB-SMAD1	5.30792	2.40815
GATAD2B-PBX3	5.09649	2.3495
GATAD2B-RELA	6.42007	2.68259
HDAC2-PAX8	6.06442	2.60037
JUND-RELB	5.56444	2.47624
JUND-SRF-ZNF592	5.92011	2.56563
JUND-ZNF24	7.32754	2.87333
KDM5A-SUZ12	5.55095	2.47274
MAZ-PBX3	5.74076	2.52124
MAZ-PBX3-REST	5.40583	2.43452
MLLT1-RFX5	6.40571	2.67936
NFXL1-RELB-ZNF592	5.28517	2.40195
RELB-SPI1	6.01083	2.58756
RELB-SPI1-ZNF622	5.35901	2.42197
RELB-STAT1	9.08957	3.18421
RELB-ZNF592	5.42458	2.43951
RELB-ZNF622	5.55346	2.47339
SMAD1-ZNF592	6.07621	2.60317
SREBF1-ZNF274	6.39879	2.6778
SRF-ZNF592	6.28776	2.65255
SUZ12-ZNF274	7.00994	2.8094

## Sheet: S3B
TF Name	MLPU Main Effect	Bin	MLPU Scaled Main Effect	MLPU Rank	ENET Main Effect	ENET Rank	Difference in Rank(MPU Rank - ENET Rank)
ZNF143	4.00893	5	0.385881	20	-0.232541	148	-128
TBL1XR1	9.81014	5	1	1	-0.0398187	122	-121
E4F1	8.2881	5	0.838876	3	-0.0291895	118	-115
DPF2	4.83127	5	0.472935	17	-0.0738815	132	-115
YY1	3.30378	5	0.311233	27	-0.101557	137	-110
BCL11A	9.15976	5	0.93115	2	-0.00782585	105	-103
ZFP36	2.69962	4	0.247276	36	-0.0921129	136	-100
ETV6	2.60586	4	0.237351	37	-0.0807075	133	-96
BHLHE40	1.11586	4	0.079619	58	-0.211919	147	-89
ZNF217	5.68181	5	0.562973	13	-0.0031523	100	-87
IRF4	1.95033	4	0.167956	48	-0.0829809	134	-86
SRF	3.18443	4	0.298599	31	-0.024525	115	-84
SREBF1	0.592535	3	0.0242195	64	-0.196259	146	-82
BCL3	1.83476	4	0.155722	50	-0.0735548	131	-81
NR2C2	5.37559	5	0.530557	14	0.000326773	92	-78
NFATC1	0.810537	3	0.0472972	61	-0.10246	138	-77
BMI1	0.708808	3	0.0365282	63	-0.123444	140	-77
MTA3	3.79611	5	0.363352	23	-0.00268839	99	-76
POU2F2	2.33971	4	0.209176	43	-0.0261726	116	-73
FOXK2	0.357101	3	-0.000703732	67	-0.111486	139	-72
ATF2	0.741784	3	0.040019	62	-0.0667617	130	-68
ATF3	2.4781	4	0.223826	41	-0.0109767	108	-67
MAX	3.25025	5	0.305567	29	0	95	-66
MEF2B	-0.242052	3	-0.0641303	76	-0.160062	142	-66
POLR3G	3.64178	5	0.347014	25	0.00622238	82	-57
NFYB	0.426007	3	0.00659078	66	-0.0406774	123	-57
MYB	3.45661	5	0.327412	26	0.00699672	80	-54
BRCA1	4.50053	5	0.437921	18	0.0141784	69	-51
SPI1	-0.88612	3	-0.132312	84	-0.0840697	135	-51
TBX21	6.32349	5	0.630901	10	0.0288487	59	-49
MEF2C	3.66791	5	0.34978	24	0.0122128	72	-48
FOS	3.84218	5	0.368229	21	0.0229704	65	-44
FOXM1	3.83888	5	0.367879	22	0.0228858	66	-44
SP1	-1.84346	2	-0.233656	99	-0.163178	143	-44
CREM	6.50709	5	0.650337	8	0.0517861	50	-42
NFATC3	2.21037	4	0.195484	45	0.00279217	87	-42
NFXL1	0.204998	3	-0.0168054	69	-0.011436	109	-40
SUZ12	-2.66014	2	-0.32011	109	-1.03291	149	-40
ARID3A	2.77857	4	0.255635	35	0.0112488	74	-39
KLF5	2.16433	4	0.190611	46	0.00331863	85	-39
REST	-1.03934	3	-0.148531	86	-0.0465897	125	-39
EP300	-0.71984	3	-0.114709	81	-0.0352905	119	-38
RB1	5.13945	5	0.505558	16	0.0558817	49	-33
BATF	0.515845	3	0.0161011	65	-0.00264535	98	-33
ATF7	-0.389103	3	-0.0796972	77	-0.0132618	110	-33
RELA	7.38888	5	0.743684	5	0.0719739	37	-32
ELK1	1.72563	4	0.144169	51	0.00602148	83	-32
PKNOX1	0.997303	3	0.0670684	60	0.00141004	91	-31
RAD21	-3.09022	2	-0.365639	114	-0.18055	145	-31
RELB	5.26966	5	0.519343	15	0.0670111	44	-29
NR2F1	-1.90579	2	-0.240255	101	-0.0631034	129	-28
STAT5A	1.17332	4	0.0857015	56	0.00661247	81	-25
CBFB	6.19993	5	0.617821	12	0.0771143	36	-24
UBTF	6.54513	5	0.654364	7	0.100848	28	-21
ZNF622	2.53594	4	0.229949	39	0.0294855	57	-18
TCF3	2.49036	4	0.225124	40	0.0289659	58	-18
USF2	-2.68096	2	-0.322315	110	-0.060495	128	-18
BACH1	2.1012	4	0.183927	47	0.0247756	64	-17
RFX5	-1.54672	2	-0.202243	97	-0.0241663	114	-17
EZH2	-4.09618	1	-0.472131	124	-0.132947	141	-17
E2F4	3.12344	4	0.292142	32	0.0570359	48	-16
ZZZ3	7.65636	5	0.772	4	0.152729	18	-14
CREB1	1.00781	4	0.0681812	59	0.0119765	73	-14
SREBF2	-1.18295	2	-0.163734	90	-0.00531164	104	-14
SMC3	-4.41349	1	-0.505721	130	-0.178467	144	-14
CEBPZ	3.0305	4	0.282304	34	0.0584409	46	-12
NR2C1	-1.31107	2	-0.177297	94	-0.00458747	103	-9
RCOR1	-2.5716	2	-0.310737	108	-0.0264195	117	-9
JUNB	1.87977	4	0.160487	49	0.0306095	56	-7
PBX3	-3.2814	2	-0.385877	117	-0.0440579	124	-7
NFE2	6.58638	5	0.658731	6	0.200232	12	-6
RUNX3	-1.1126	3	-0.156287	87	0.00024606	93	-6
IRF5	-0.00755616	3	-0.0393065	73	0.0102777	75	-2
CBX5	2.42116	4	0.217799	42	0.0679328	42	0
CHD4	1.55692	4	0.12631	52	0.0463577	52	0
MYC	6.46564	5	0.645949	9	0.247877	8	1
TARDBP	-4.00768	1	-0.462762	123	-0.0353142	120	3
TRIM22	1.22533	4	0.0912072	55	0.0490696	51	4
STAT3	-0.742077	3	-0.117063	82	0.0082795	77	5
IKZF1	-3.18037	2	-0.375182	116	-0.0142989	111	5
CTCF	3.2741	5	0.308092	28	0.135791	20	8
TAF1	6.29678	5	0.628074	11	0.496959	2	9
CEBPB	0.124809	3	-0.0252942	71	0.026863	62	9
HDAC6	3.05987	4	0.285413	33	0.124566	23	10
PAX5	-5.60894	1	-0.632272	137	-0.0516489	126	11
JUND	-3.16765	2	-0.373835	115	-0.00386282	102	13
RAD51	2.29176	4	0.204101	44	0.0945077	30	14
SMAD5	4.19382	5	0.405453	19	0.659103	1	18
CUX1	1.45906	4	0.11595	53	0.0828325	35	18
MAFK	-0.443603	3	-0.0854666	78	0.0279354	60	18
ZNF24	-1.15343	3	-0.160609	88	0.0138975	70	18
CHD2	-7.29814	1	-0.811091	146	-0.0520615	127	19
ELF1	-4.2377	1	-0.487111	127	-0.0107903	107	20
ZSCAN29	-6.2017	1	-0.695022	142	-0.0361211	121	21
ZNF207	-1.18241	3	-0.163677	89	0.0208437	67	22
ETS1	1.14946	4	0.0831761	57	0.0840326	34	23
STAT1	-2.69823	2	-0.324143	111	0.00232069	88	23
EBF1	-3.67482	1	-0.427525	120	-0.00164025	97	23
USF1	-5.22528	1	-0.591657	136	-0.017991	113	23
ESRRA	-0.545139	3	-0.0962152	79	0.0442338	54	25
MTA2	-4.11723	1	-0.474358	126	-0.00384509	101	25
PML	3.20184	4	0.300442	30	0.309319	4	26
SMARCA5	0.185453	3	-0.0188744	70	0.0691	40	30
ZEB1	-1.28574	2	-0.174616	93	0.0271502	61	32
BCLAF1	-1.40147	2	-0.186867	96	0.025715	63	33
EED	-3.98707	1	-0.46058	122	0.00213786	89	33
GABPA	-6.01404	1	-0.675156	139	-0.00804954	106	33
E2F8	-3.33103	2	-0.391131	118	0.00523946	84	34
MLLT1	2.55445	4	0.231909	38	0.327131	3	35
RXRA	-2.31868	2	-0.283963	105	0.0179841	68	37
ZNF274	-4.78057	1	-0.54458	133	-0.0014261	96	37
ARNT	-9.08265	1	-1	149	-0.0168889	112	37
NBN	-4.10005	1	-0.47254	125	0.00304493	86	39
CBX3	-0.749016	3	-0.117798	83	0.068399	41	42
MEF2A	-4.68024	1	-0.533959	132	0.00142882	90	42
HDGF	0.228111	3	-0.0143586	68	0.123296	24	44
KDM5A	1.28467	4	0.097489	54	0.240926	9	45
NFYA	-0.0497709	3	-0.0437753	74	0.0999022	29	45
TCF7	-1.70735	2	-0.219247	98	0.0456116	53	45
MAZ	-6.0482	1	-0.678772	140	0.000104461	94	46
IRF3	-1.02815	3	-0.147347	85	0.0700248	38	47
SKIL	-1.27788	2	-0.173783	92	0.067909	43	49
NFIC	0.107465	3	-0.0271302	72	0.125015	22	50
HSF1	-2.0112	2	-0.251413	102	0.0623265	45	57
TCF12	-5.04506	1	-0.572579	134	0.00861014	76	58
SIX5	-5.65396	1	-0.637038	138	0.00802375	78	60
PAX8	-0.0713094	3	-0.0460554	75	0.18518	13	62
IKZF2	-6.1718	1	-0.691856	141	0.00782828	79	62
EGR1	-1.25858	2	-0.171741	91	0.112706	26	65
ASH2L	-0.655364	3	-0.107884	80	0.181429	14	66
GATAD2B	-1.88976	2	-0.238558	100	0.110321	27	73
ZNF384	-2.40952	2	-0.29358	106	0.0863738	33	73
ZNF592	-8.43677	1	-0.931628	148	0.0128488	71	77
NRF1	-1.31475	2	-0.177686	95	0.158583	16	79
ZNF687	-2.51173	2	-0.304399	107	0.11567	25	82
ZBTB33	-4.25014	1	-0.488428	128	0.0697288	39	89
MXI1	-7.98761	1	-0.884079	147	0.0321206	55	92
CHD1	-2.18872	2	-0.270206	104	0.228221	11	93
ZBED1	-2.77431	2	-0.332196	112	0.155009	17	95
YBX1	-2.03318	2	-0.25374	103	0.258554	7	96
WRNIP1	-2.94783	2	-0.350565	113	0.172781	15	98
RBBP5	-3.47985	2	-0.406886	119	0.126139	21	98
SMAD1	-6.65249	1	-0.742742	145	0.0577508	47	98
HCFC1	-3.71426	1	-0.4317	121	0.136603	19	102
ZBTB40	-6.24043	1	-0.699121	143	0.0925265	31	112
HDAC2	-6.57515	1	-0.734555	144	0.0924658	32	112
SIN3A	-4.36847	1	-0.500955	129	0.268217	5	124
KDM1A	-4.48491	1	-0.513281	131	0.263973	6	125
TBP	-5.0482	1	-0.572912	135	0.240843	10	125
